# Supplementary material for: Spatial arrangement of dynamic surface species from solid-state NMR and machine learning-accelerated MD simulations
Source: Royal Society of Chemistry journal article supplement (doi:10.1039/d2cc05861h), 2022-01-01
Supplement: d2cc05861h1.pdf [file d2cc05861h1.pdf]

**Electronic Supplementary Information**

**Spatial Arrangement of Dynamic Surface Species from Solid-State NMR and Machine Learning-Accelerated MD Simulations**

Takeshi Kobayashi,<sup>a\*</sup> Da-Jiang Liu<sup>a\*</sup> and Frédéric A. Perras<sup>a</sup>

<sup>a</sup> U.S. DOE Ames National Laboratory, Ames, IA, 50011, USA

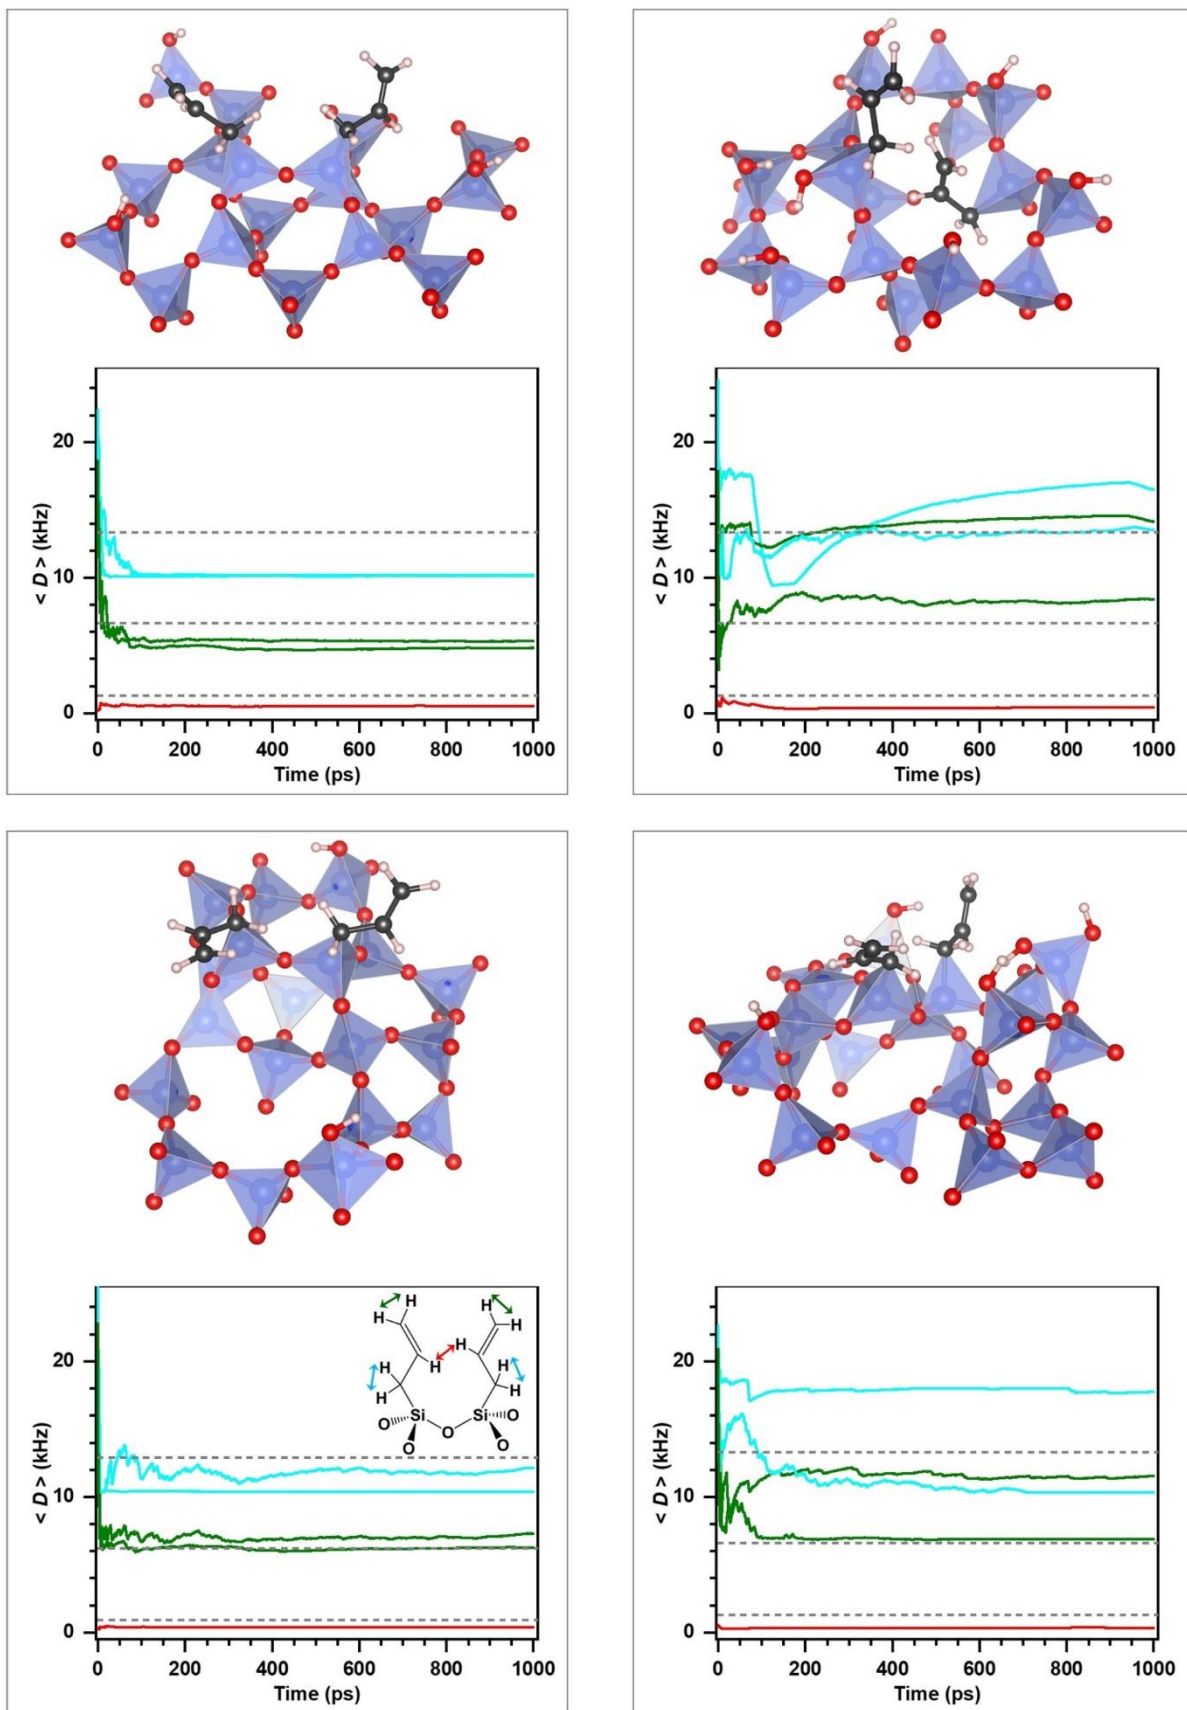

**Fig. S1** Arrangement of AL groups on the silica surface and the evolution of  $^1\text{H}$ – $^1\text{H}$  dipolar coupling constants as a function of the DeePMD simulation time. Purple tetrahedra represents  $\text{SiO}_4$ . Red, white, and grey spheres represent oxygen, hydrogen, and carbon atoms, respectively. Not all atoms used for the MD simulations are shown for visual clarity.

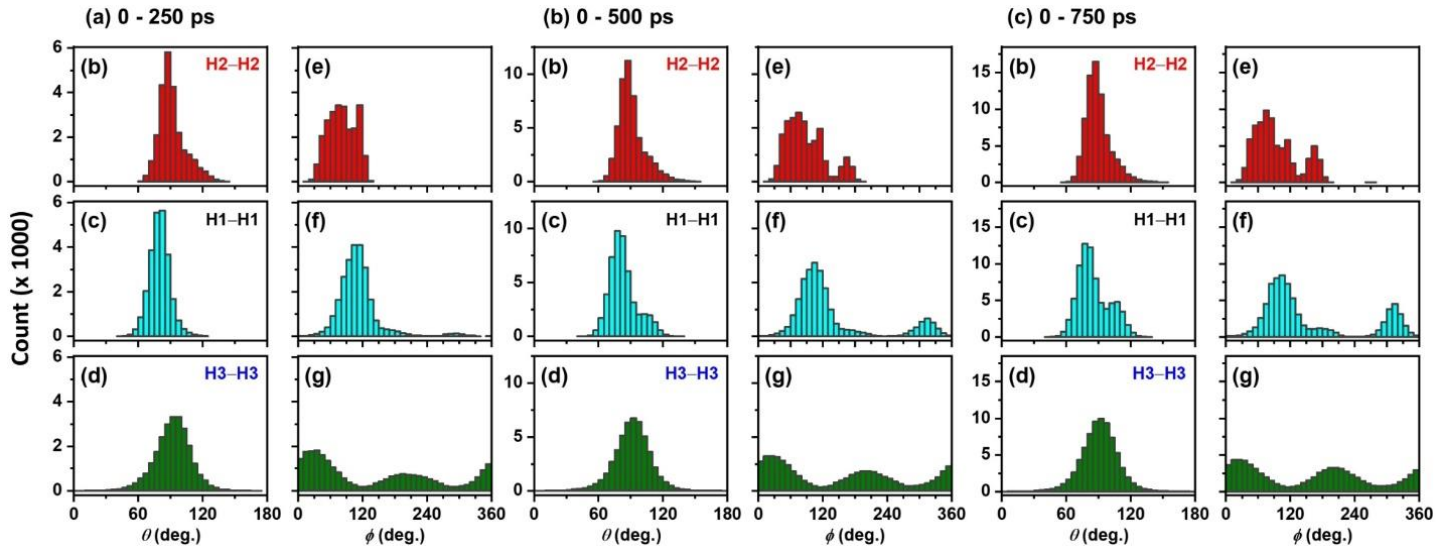

**Fig. S2** Histograms of  $\theta$  and  $\phi$  between 0 s and 250 ps (a), 0 s and 500 ps (b), and 0 s and 750 ps (c) from the DeePMD simulation of the model shown in Fig. 3a.

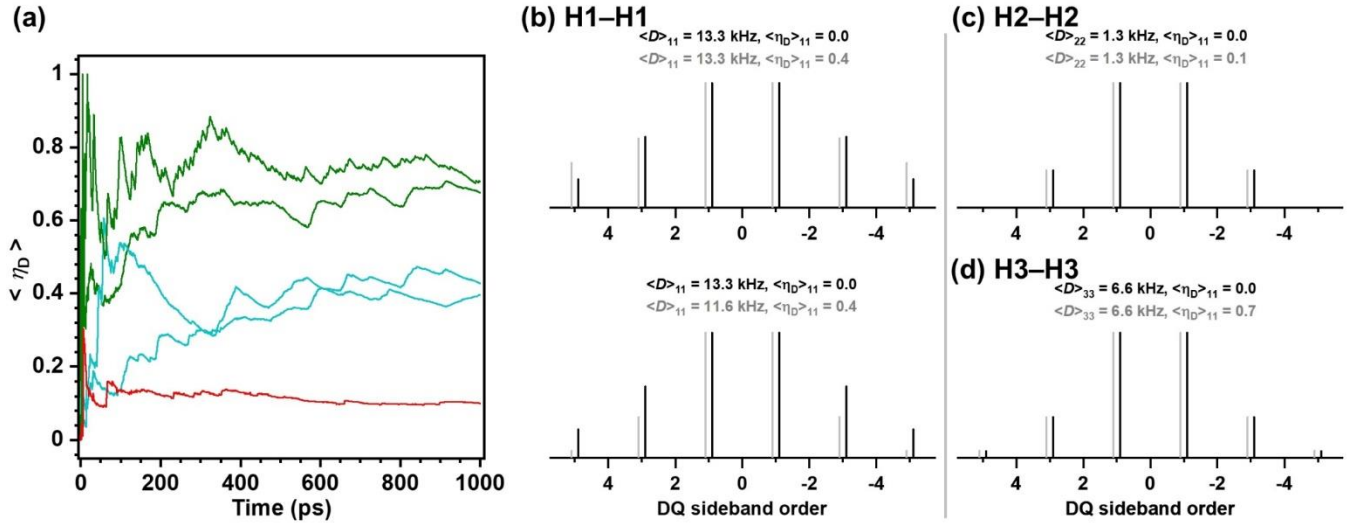

**Fig. S3** (a) The evolution of asymmetry parameter of  $^1\text{H}$ - $^1\text{H}$  dipolar coupling for the model shown in Fig. 3a as a function of the DeePMD simulation time. (b-d) Simulations comparing the DQ sideband manifolds obtained with and without the inclusion of  $\eta_D$ .

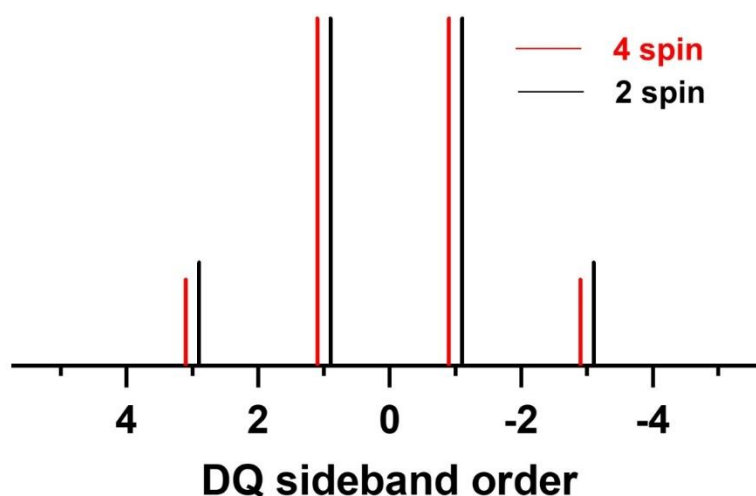

**Fig. S4** Comparison of H2–H2 DQ sideband patterns simulated with 2 and 4 spin systems. The 4 spin simulation involves additional two H1 protons as  $-C(-H1)_2-C(-H2)=$  and  $-C(-H2)=$ , where the H1–H1 ( $\langle D \rangle_{11} = 11.6$  kHz) and H1–H2 ( $\langle D \rangle_{12} = 2$  kHz) intramolecular dipolar couplings are taken into account.

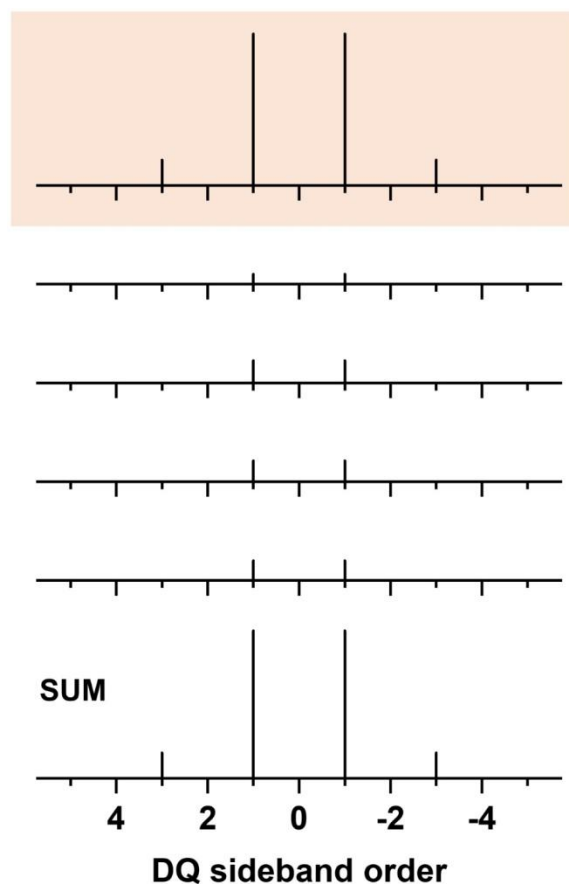

**Fig. S5** Simulated H2–H2 DQ sideband patterns for all models and their sum (bottom). The model shown in Fig. 3a showed much more intense DQ-filtered signals as compared to other models and is the only model that yields observable sidebands at  $\pm 3$ . Given that, Fig. 3a is considered a representative model of the localized functional groups.
